# Supplementary material for: The influence of intralayer structural distortions on the electrical and magnetic properties of V1+xMo2−xS4(0 ≤ x ≤2)
Source: Royal Society of Chemistry journal article supplement (doi:10.1039/b406812b), 2004-01-01
Supplement: b406812b.doc [file b406812b.doc]

**The Influence of Intralayer Structural Distortions**

**on the Electrical and Magnetic Properties**

**of V1+xMo2-xS4 (0x2)**

Anthony V. Powella, Andrew McDowalla, Ronald I. Smithb, Tsukio Ohtanic and Y. Okuyac

aDepartment of Chemistry, Heriot-Watt University,

Edinburgh EH14 4AS, UK

bISIS Facility Rutherford Appleton Laboratory, Chilton, Didcot, Oxon, OX11 0QX

c Department of Chemistry, Faculty of Science, Okayama University of Science, 1-1Ridai-cho, Okayama 700-005, Japan

**Electronic Supplementary Information**

Figure S.1 Final observed (crosses), calculated (full line) and difference (lower full line) powder diffraction profiles for V1=xMo2-xS4 (0x.2) phases.

| V1.25Mo1.75S4, X-ray diffraction data, space group *Cc*  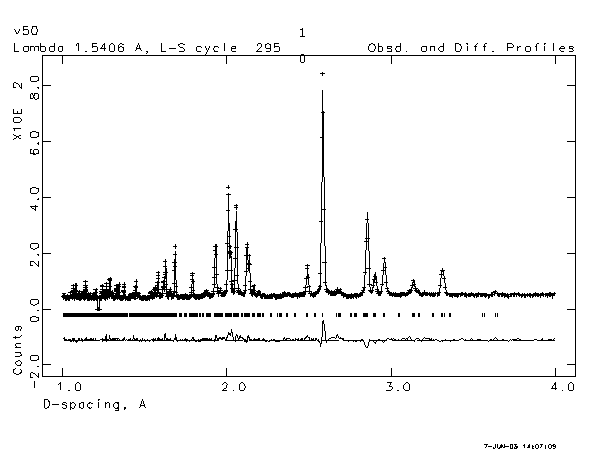 | :V1.25Mo1.75S4, neutron diffraction data, Cc space group  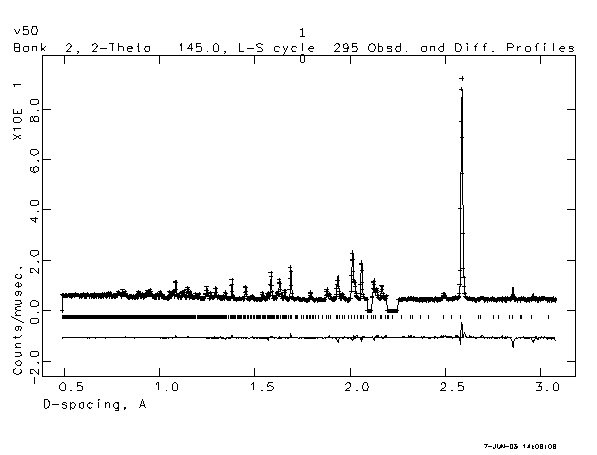 |
| --- | --- |
| V1.50Mo1.50S4, X-ray diffraction data, space group *Cc*  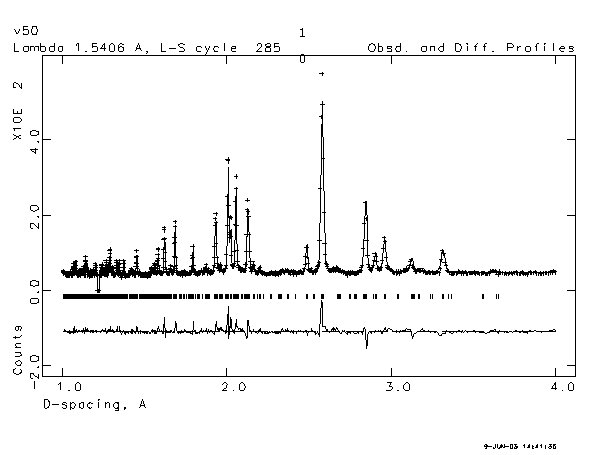 | V1.50Mo1.50S4, neutron diffraction data, space group *Cc*  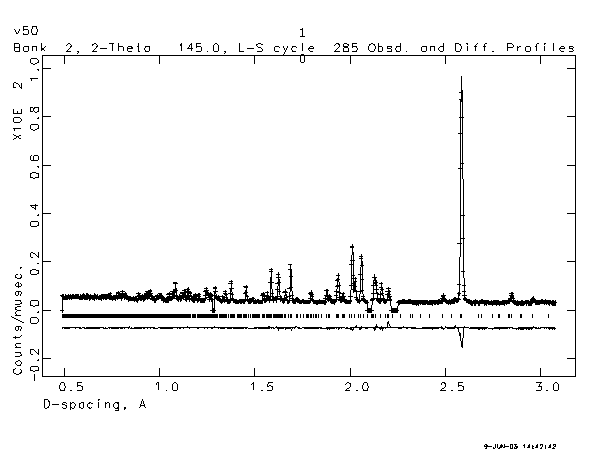 |
| V1.56Mo1.44S4, X-ray diffraction data, space group *C2/m*  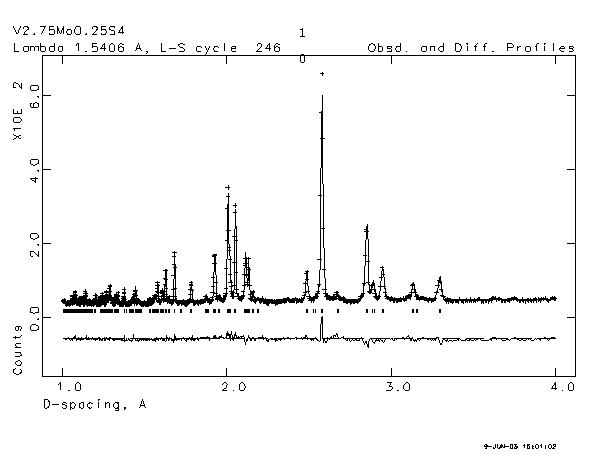 | V1.56Mo1.44S4, neutron diffraction data, space group *C2/m*  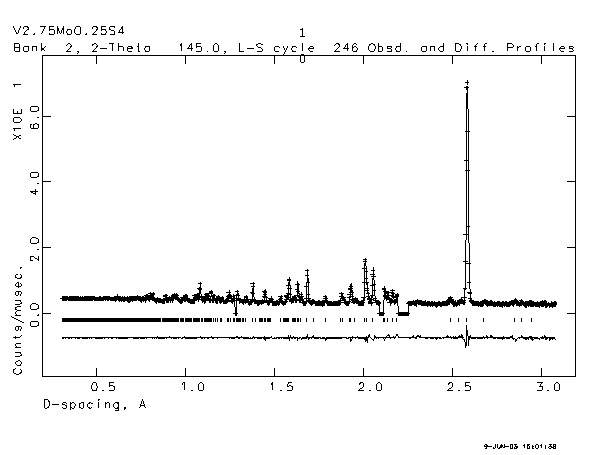 |
| V1.62Mo1.38S4, X-ray diffraction data, space group *C2/m*  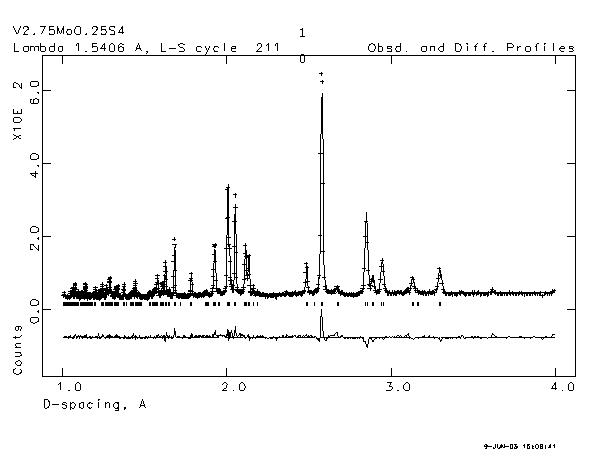 | V1.62Mo1.38S4, neutron diffraction data, space group *C2/m*  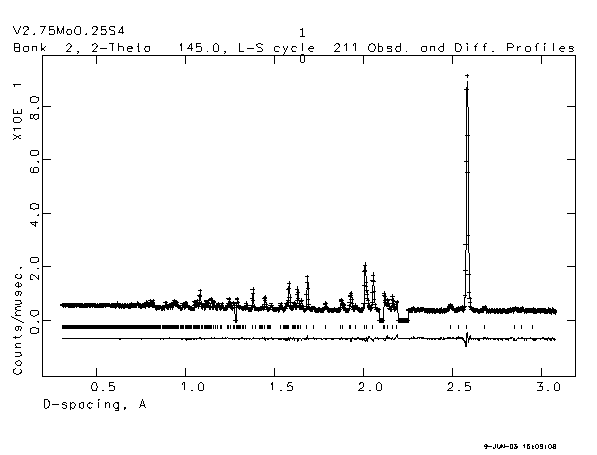 |
| V1.75Mo1.25S4, X-ray diffraction data, space group *C2/m*  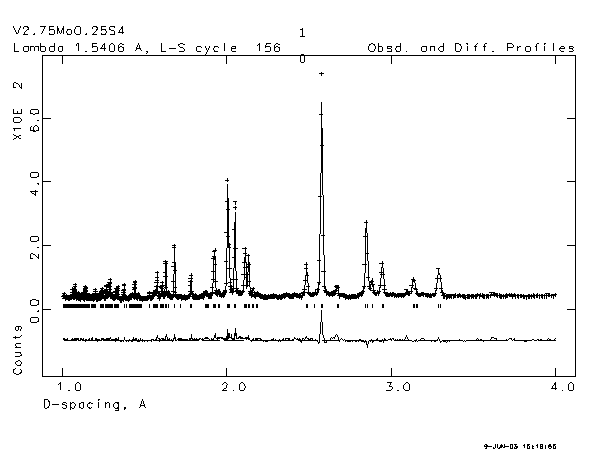 | V1.75Mo1.25S4, neutron diffraction data, space group *C2/m*  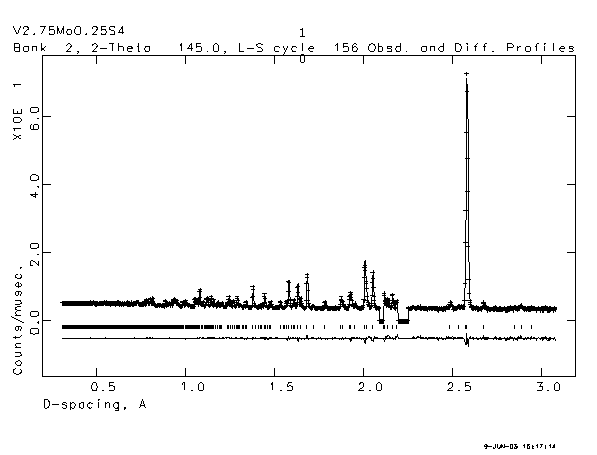 |
| V2.00Mo1.00S4, X-ray diffraction data, space group *C2/m*  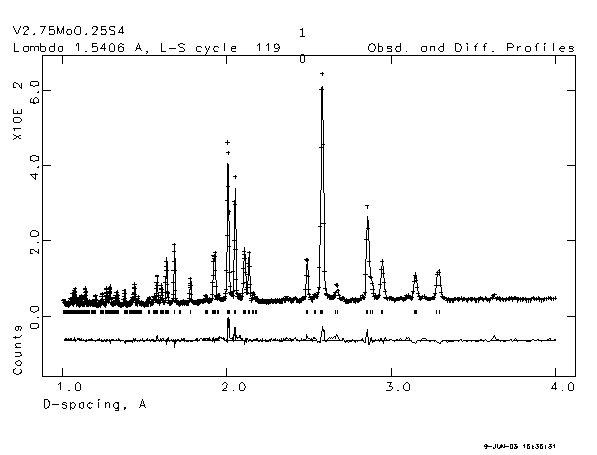 | V2.00Mo1.00S4, neutron diffraction data, space group *C2/m*  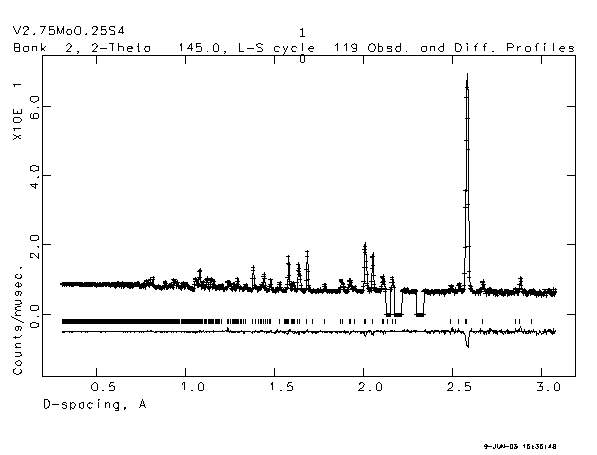 |
| V2.25Mo0.75S4, X-ray diffraction data, space group *C2/m*  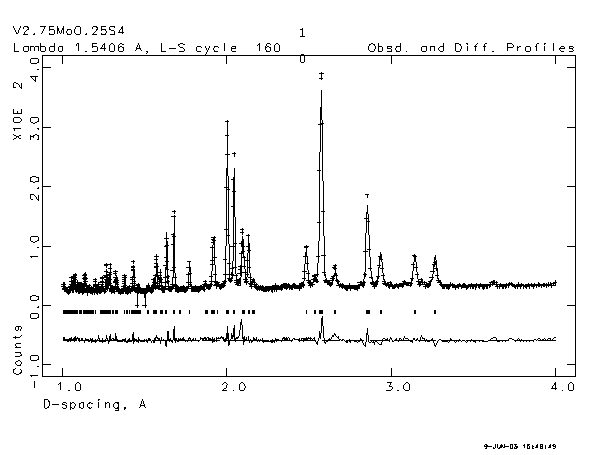 | V2.25Mo0.75S4, neutron diffraction data, space group *C2/m*  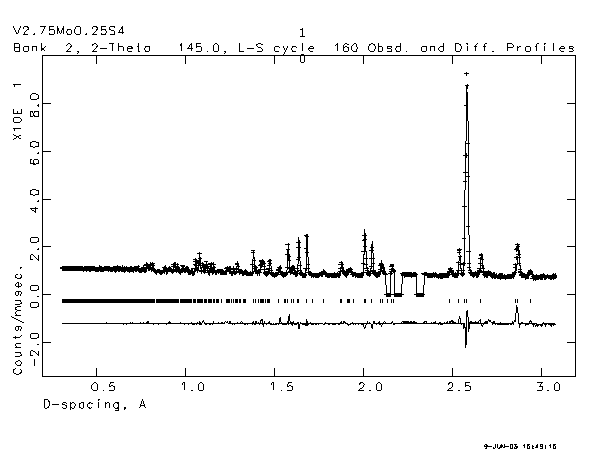 |
| V2.75Mo0.25S4, X-ray diffraction data, space group *C2/m*  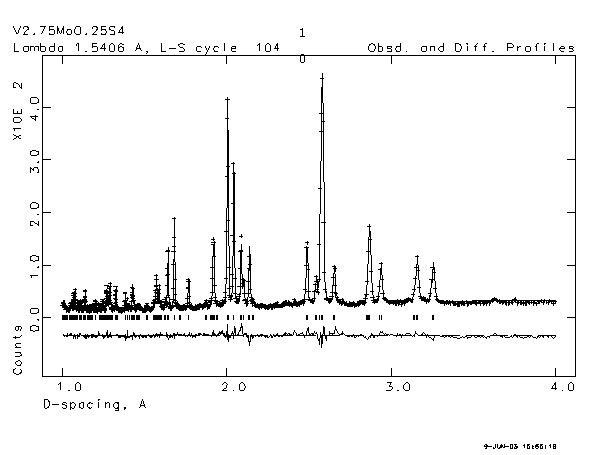 | V2.75Mo0.75S4, neutron diffraction data, space group *C2/m*  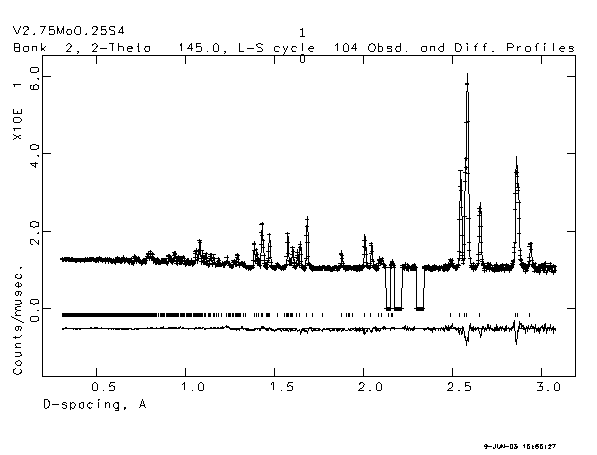 |
| V3.0S4, X-ray diffraction data, space group *C2/m*  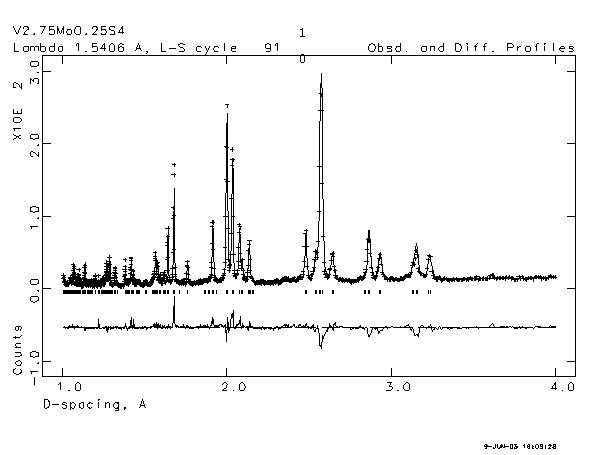 |  |

Table S.1 Refined bond distances (Å) for V1+xMo2-xS4 (0x2) phases

(a) data for phases with structures refined in the space group *Cc* (A cations are at sites within the ordered defect layer and B cations are in the dichalcogenide unit)

|  | V1.25Mo1.75S4 | V1.50Mo1.50S4 |
| --- | --- | --- |
| Bond |  |  |
| A(1)-B(2) | 3.06(6) | 3.0(2) |
| A(1)-B(4) | 2.99(8) | 3.0(2) |
| A(2)-B(1) | 2.99(9) | 3.1(1) |
| A(2)-B(3) | 3.06(9) | 3.0(2) |
| A(1)-S(2) | 2.47(7) | 2.2(1) |
| A(1)-S(3) | 2.51(9) | 2.5(1) |
| A(1)-S(4) | 2.41(9) | 2.4(1) |
| A(1)-S(5) | 2.38(9) | 2.5(2) |
| A(1)-S(6) | 2.52(9) | 2.4(2) |
| A(1)-S(7) | 2.32(7) | 2.5(1) |
| A(2)-S(1) | 2.34(8) | 2.4(2) |
| A(2)-S(3) | 2.47(9) | 2.5(2) |
| A(2)-S(4) | 2.44(9) | 2.4(2) |
| A(2)-S(5) | 2.35(9) | 2.4(2) |
| A(2)-S(6) | 2.54(9) | 2.5(2) |
| A(2)-S(8) | 2.52(8) | 2.4(2) |
| B(1)-B(2) | 2.861(8) | 2.83(1) |
| B(1)-B(3) | 2.935(8) | 2.85(1) |
| B(1)-B(4) | 2.976(5) | 3.007(7) |
| B(2)-B(4) | 2.724(7) | 2.77(1) |
| B(3)-B(4) | 2.921(7) | 2.95(1) |
| B(1)-S(1) | 2.41(2) | 2.37(2) |
| B(1)-S(2) | 2.35(2) | 2.39(20) |
| B(1)-S(3) | 2.51(2) | 2.58(2) |
| B(1)-S(4) | 2.53(2) | 2.59(2) |
| B(1)-S(6) | 2.43(2) | 2.54(2) |
| B(1)-S(8) | 2.47(2) | 2.43(2) |
| B(2)-S(1) | 2.42(2) | 2.40(2) |
| B(2)-S(2) | 2.37(2) | 2.37(2) |
| B(2)-S(3) | 2.49(2) | 2.49(2) |
| B(2)-S(4) | 2.57(2) | 2.53(2) |
| B(2)-S(5) | 2.55(2) | 2.50(1) |
| B(2)-S(7) | 2.36(2) | 2.40(2) |
| B(3)-S(1) | 2.31(2) | 2.33(2) |
| B(3)-S(3) | 2.59(2) | 2.60(2) |
| B(3)-S(5) | 2.51(2) | 2.42(2) |
| B(3)-S(6) | 2.57(2) | 2.55(2) |
| B(3)-S(7) | 2.38(2) | 2.31(1) |
| B(3)-S(8) | 2.35(2) | 2.37(2) |
| B(4)-S(2) | 2.31(2) | 2.33(2) |
| B(4)-S(4) | 2.62(2) | 2.60(2) |
| B(4)-S(5) | 2.58(2) | 2.54(2) |
| B(4)-S(6) | 2.48(2) | 2.48(1) |
| B(4)-S(7) | 2.36(2) | 2.39(2) |
| B(4)-S(8) | 2.45(2) | 2.46(2) |

(b) Data for phases with structures refined in the space group *C2/m* (A cations are at sites within the ordered defect layer and B cations are in the dichalcogenide unit)

| Bond |  | V1.56Mo1.44S4 | V1.62Mo1.38S4 | V1.75Mo1.25S4 | V2.00Mo1.00S4 |
| --- | --- | --- | --- | --- | --- |
| A-B | 2 | 3.006(1) | 3.0063(9) | 3.002(1) | 2.998(1) |
| A-S(1) | 4 | 2.449(1) | 2.4482(9) | 2.447(9) | 2.4468(9) |
| A-S(2) | 2 | 2.400(2) | 2.403(1) | 2.400(1) | 2.404(1) |
| B-B | 2 | 2.853(2) | 2.847(1) | 2.842(1) | 2.835(2) |
| B-S(1)a | 1 | 2.547(2) | 2.551(2) | 2.551(2) | 2.558(2) |
| B-S(1)b | 2 | 2.514(2) | 2.515(1) | 2.514(1) | 2.513(1) |
| B-S(2)a | 1 | 2.363(2) | 2.357(1) | 2.356(1) | 2.349(2) |
| B-S(2)b | 2 | 2.375(1) | 2.372(1) | 2.370(1) | 2.358(1) |
|  | | | | |  |
|  |  | V2.25Mo0.75S4 | V2.75Mo0.25S4 | V3S4 |  |
| A-B | 2 | 2.989(2) | 2.984(4) | 2.959(4) |  |
| A-S(1) | 4 | 2.438(1) | 2.447(1) | 2.452(4) |  |
| A-S(2) | 2 | 2.402(2) | 2.401(1) | 2.403(5) |  |
| B-B | 2 | 2.821(2) | 2.830(6) | 2.928(6) |  |
| B-S(1)a | 1 | 2.566(2) | 2.548(4) | 2.477(7) |  |
| B-S(1)b | 2 | 2.514(2) | 2.519(3) | 2.484(5) |  |
| B-S(2)a | 1 | 2.340(2) | 2.341(4) | 2.383(6) |  |
| B-S(2)b | 2 | 2.346(2) | 2.330(3) | 2.336(5) |  |
